# Supplementary material for: Novel TiO2/GO/CuFe2O4 nanocomposite: a magnetic, reusable and visible-light-driven photocatalyst for efficient photocatalytic removal of chlorinated pesticides from wastewater
Source: Royal Society of Chemistry journal article supplement (doi:10.1039/d0ra02874f), 2020-01-01
Supplement: d0ra02874f1.pdf [file d0ra02874f1.pdf]

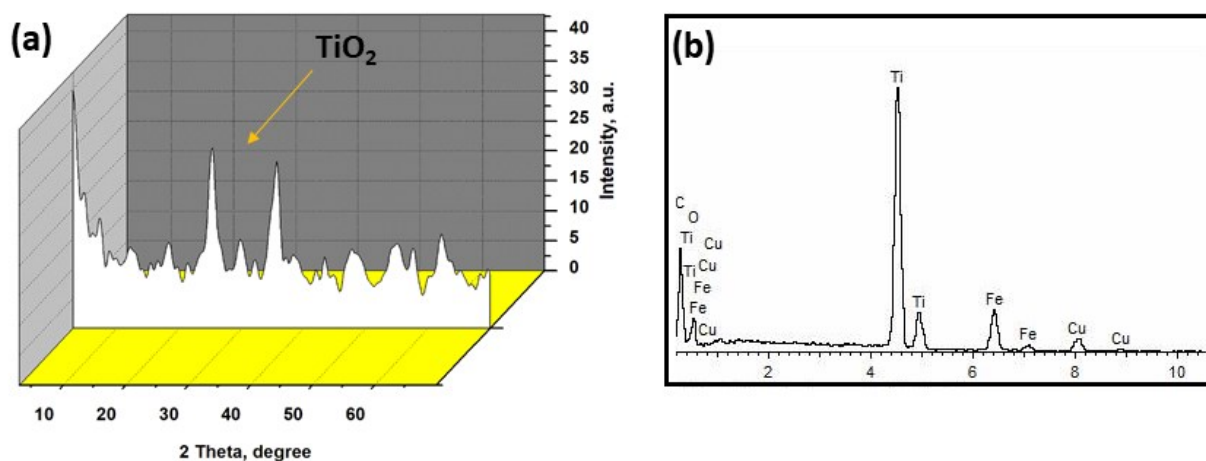

**Figure 1(a)** X-ray diffraction pattern and **(b)** EDX analysis of as-synthesized  $\text{TiO}_2/\text{GO}/\text{CuFe}_2\text{O}_4$  nanocomposite

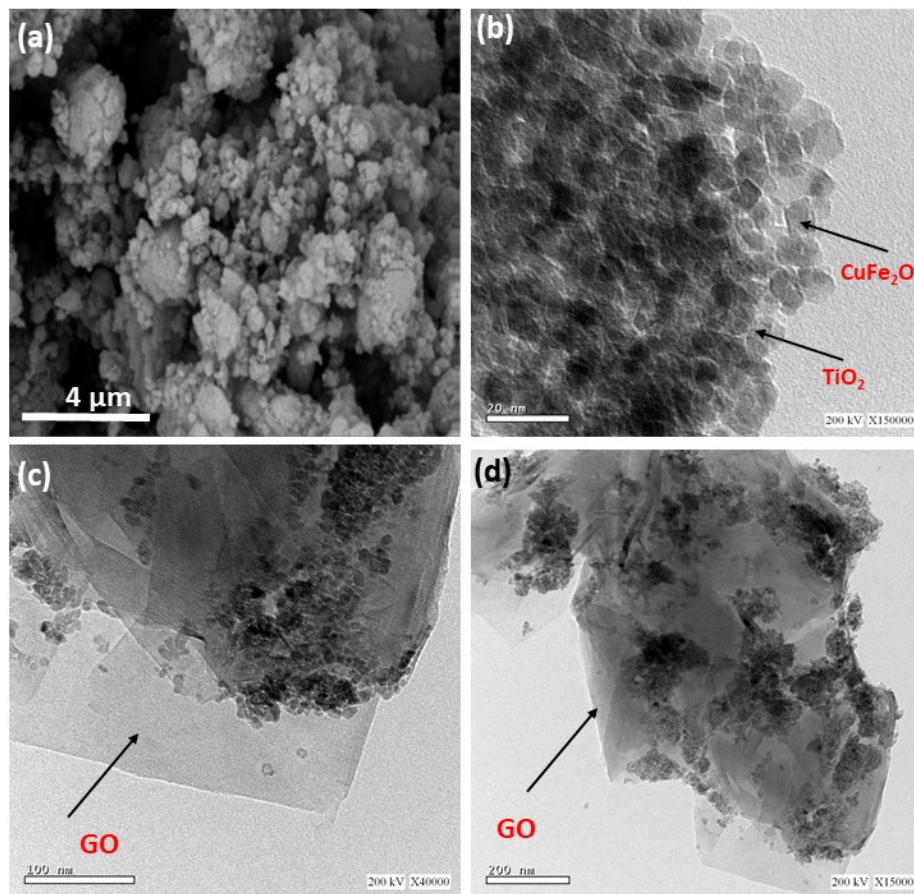

**Figure 2(a)** SEM and (b-d) TEM images of as-synthesized  $\text{TiO}_2/\text{GO}/\text{CuFe}_2\text{O}_4$  nanocomposite

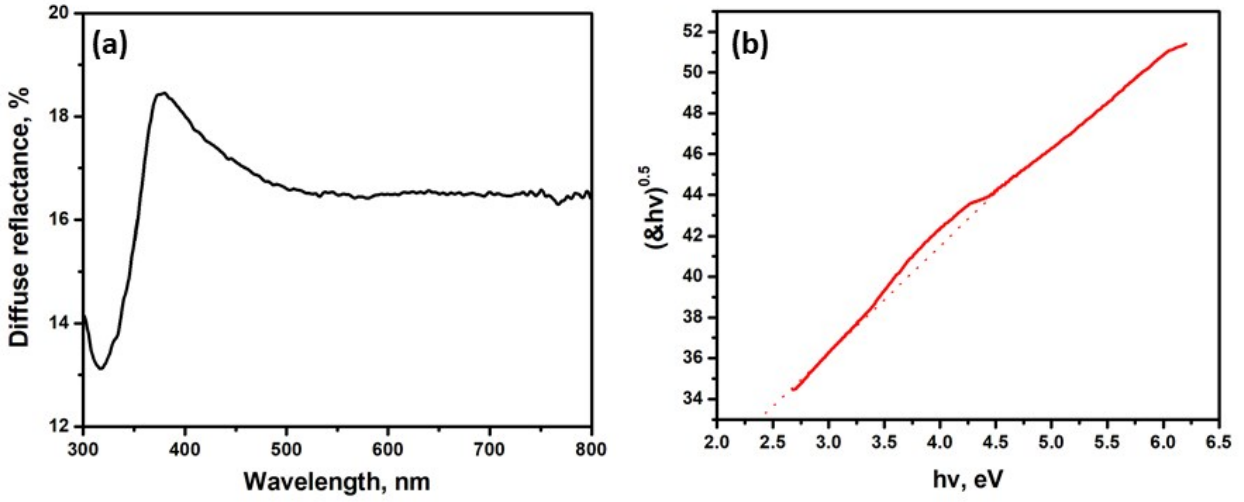

**Figure 3(a)** Diffused reflectance spectra and **(b)** Tauc plot of  $\text{TiO}_2/\text{GO}/\text{CuFe}_2\text{O}_4$  nanocomposite

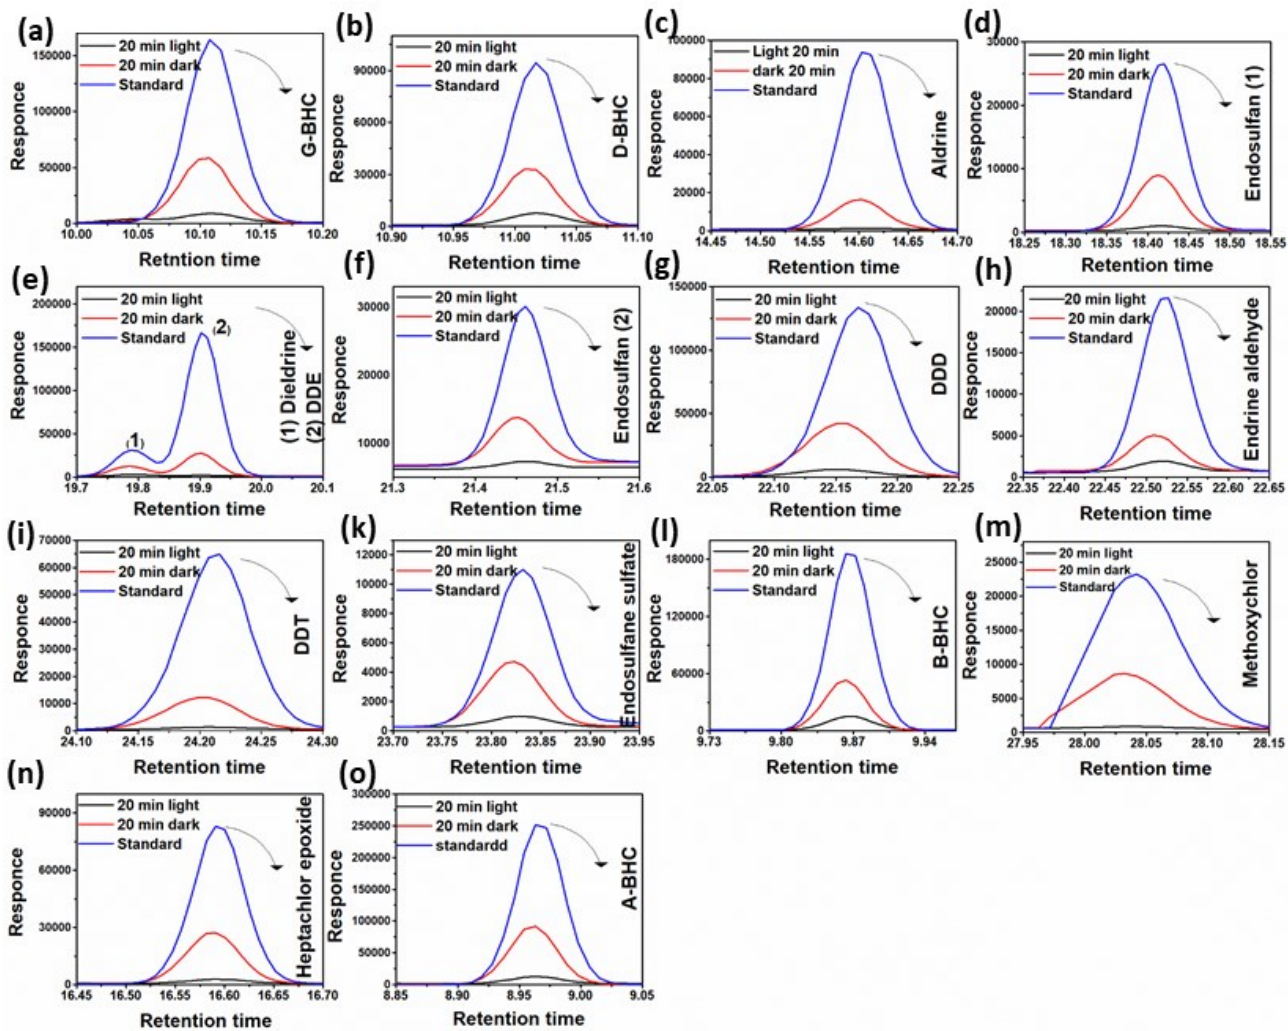

Figure 4(a-o) Peak elution change of selected pesticides vs retention times' using  $\text{TiO}_2/\text{GO}/\text{CuFe}_2\text{O}_4$  nanocomposite

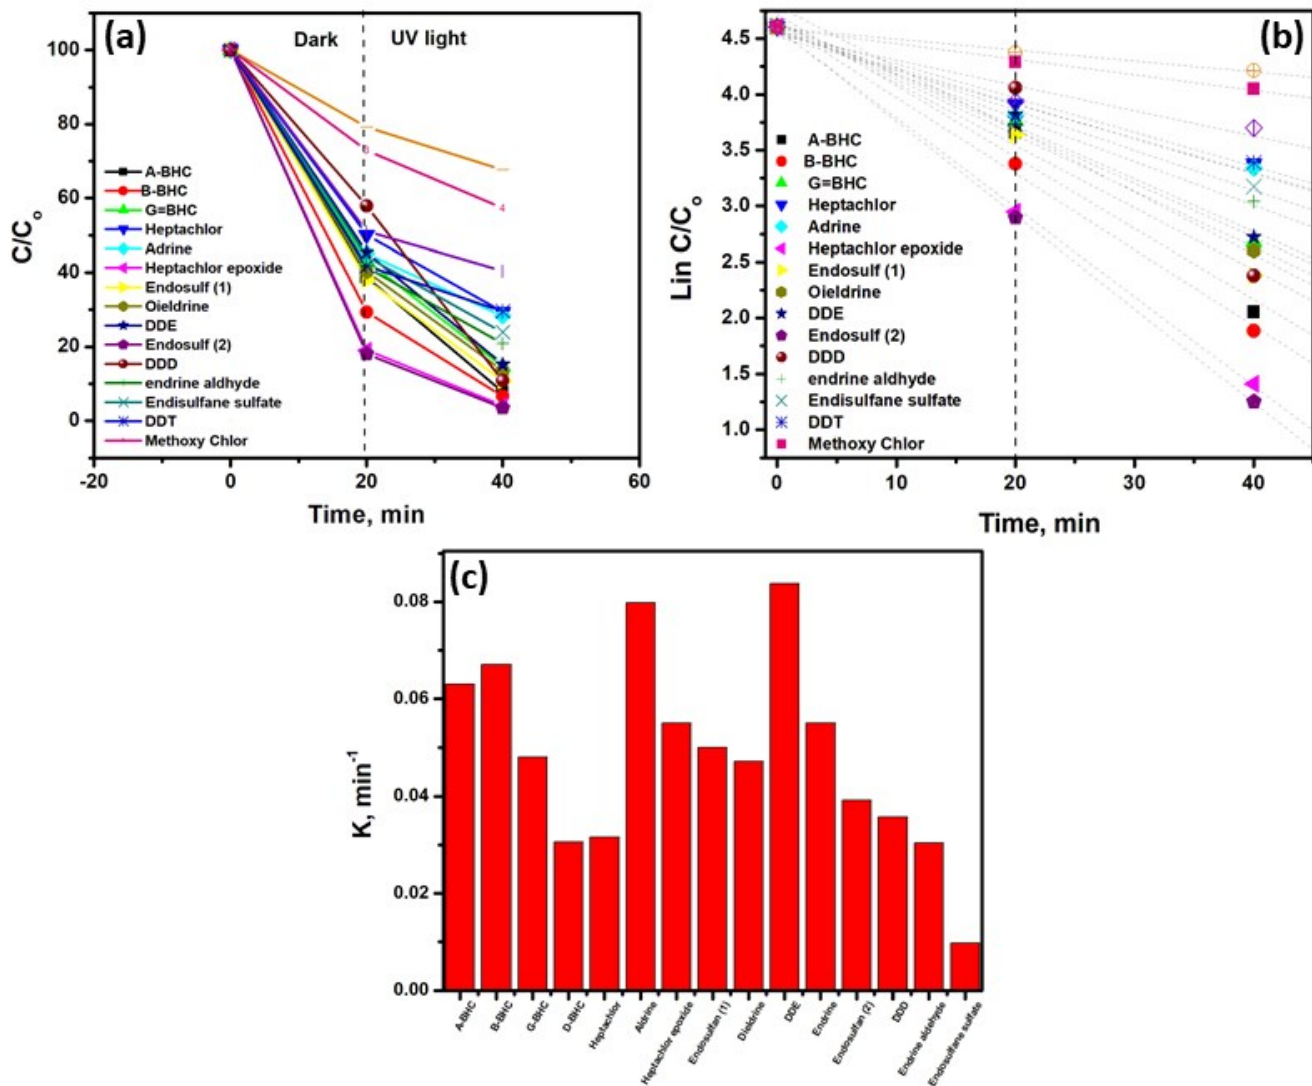

**Figure 5** (a) Removal efficiency of selected pesticides as function of irradiation time, (b)  $\ln(C/C_0)$  vs. time (min) curve for photodegradation of selected pesticides and (c) photodegradation rate in the presence of  $\text{TiO}_2/\text{GO}/\text{CuFe}_2\text{O}_4$  nanocomposite

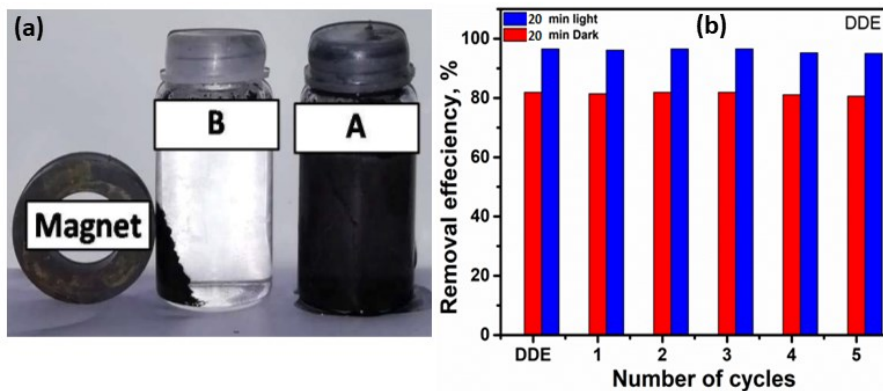

**Figure 6** (a) Photograph of the magnetic nanocomposite solution, (b) the recyclability of DDE type of pesticide by  $\text{TiO}_2/\text{GO}/\text{CuFe}_2\text{O}_4$  nanocomposite

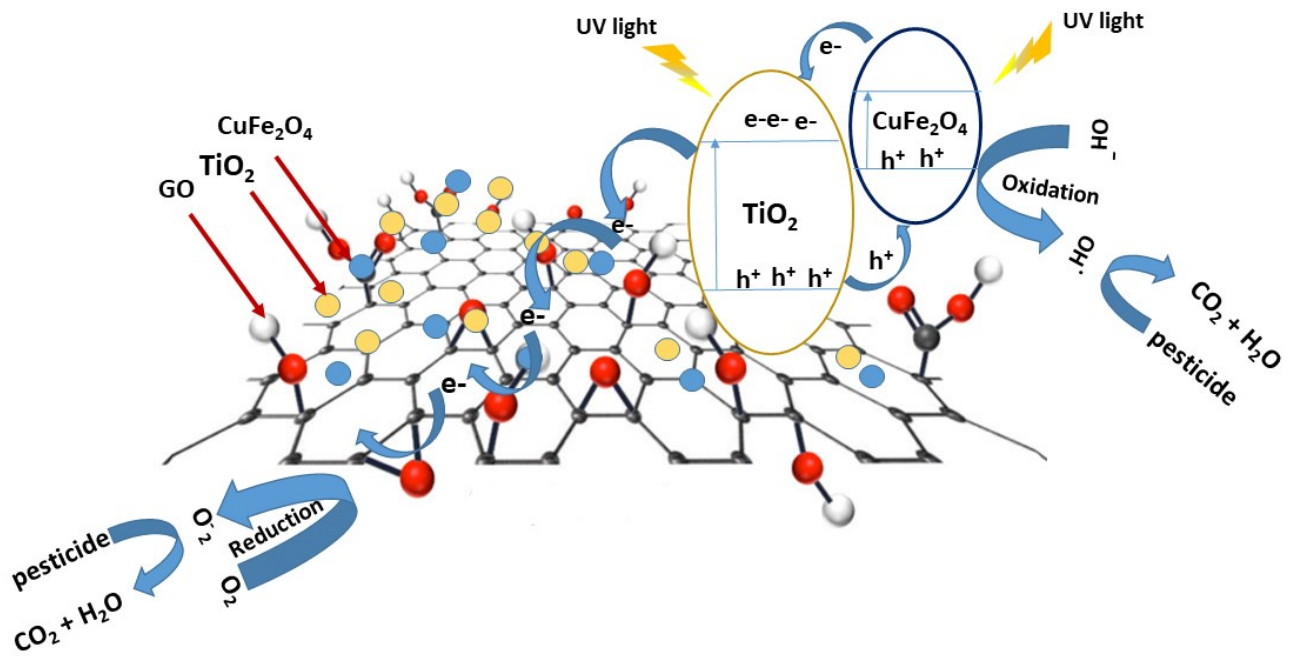

**Figure 7** Proposed mechanisms of charge separation via direct Z-type scheme under UV illumination
